# Supplementary material for: The Effects of Flexibility on dsDNA–dsDNA Interactions
Source: MDPI journal article supplement (doi:10.3390/life12050699), 2022-05-07
Supplement: s1 [file s1]

## Supporting Information

### The effects of flexibility on dsDNA-dsDNA interactions

Chuanying Chen, B. Montgomery Pettitt\*

Department of Biochemistry & Molecular Biology, Sealy Center for Structural Biology and  
Molecular Biophysics, University of Texas Medical Branch, Galveston, TX 77555

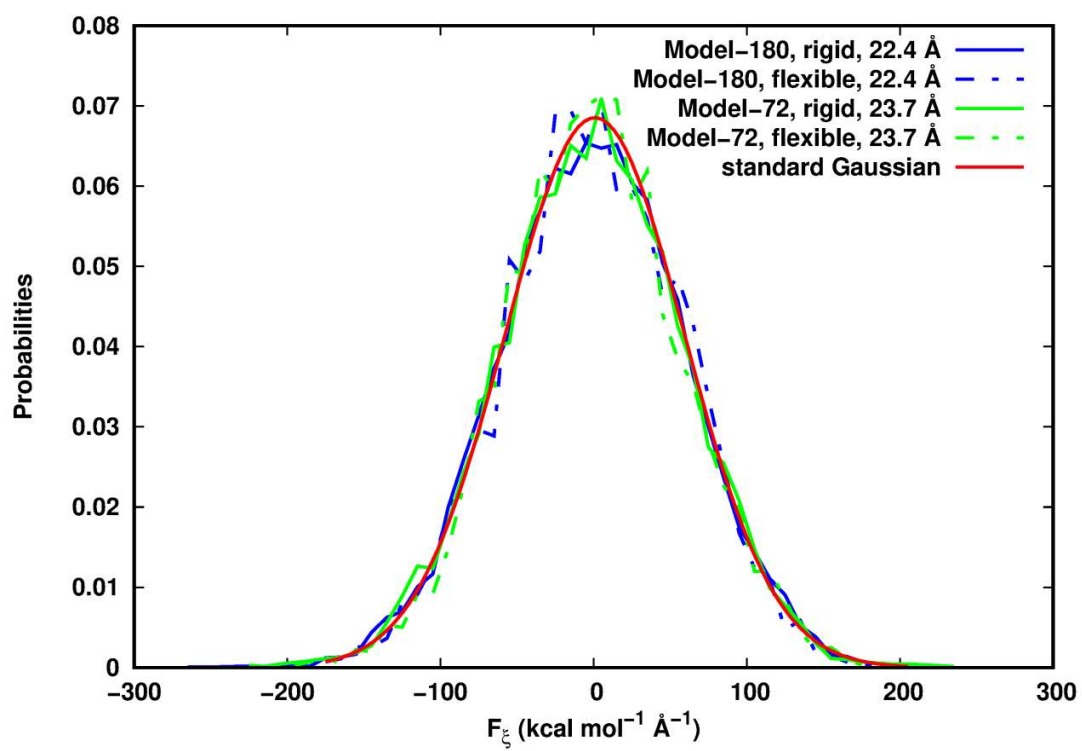

**Figure S1.** Distribution of instantaneous force at chosen separation distances for both flexible and rigid systems.

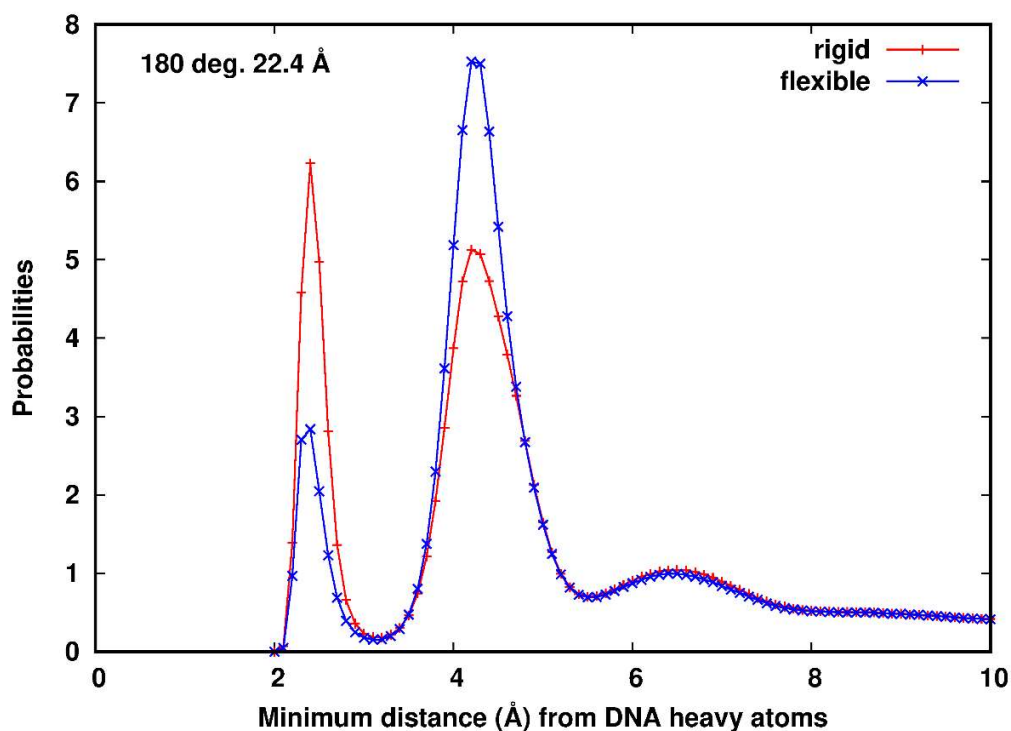

**Figure S2.** Minimum distance distribution of  $\text{Na}^+$  ions from heavy atoms of dsDNAs in the rigid and flexible structures of Model-180 with the inter-helical distance at 22.4 Å. The distributions for the other configurations with different distance separations are similar. A first sharp peak centered at 2.4 Å corresponds to a direct contact of sodium ions to DNA phosphates or base group oxygen atoms, and a second broader peak at ~4.2 Å corresponds to the interaction of the hydrated  $\text{Na}^+$  ions with the negatively charged atoms.

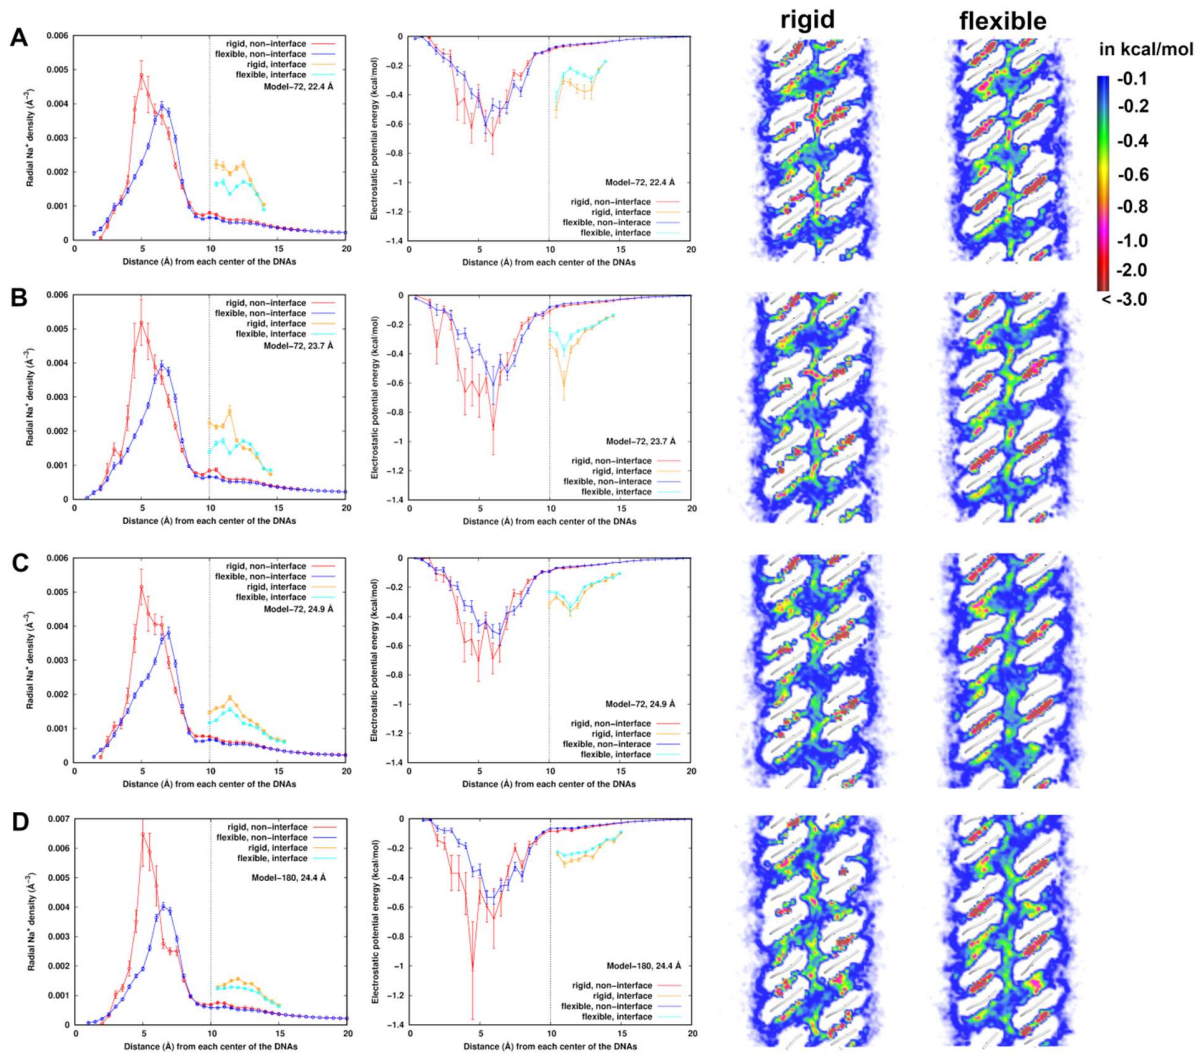

**Figure S3.** From left to right are radial distribution of  $\text{Na}^+$  ions number density from the helical center of the dsDNAs, radial distribution of electrostatic potential energy of  $\text{Na}^+$  ions with dsDNAs, a cross section of electrostatic potential energy in rigid structures and flexible structures, respectively. (A) Model-72 with the inter-helical distance  $d = 22.4 \text{ \AA}$ ; (B) Model-72 with  $d = 23.7 \text{ \AA}$ ; (C) Model-72 with  $d = 24.9 \text{ \AA}$  and (D) Model-180 with  $d = 24.4 \text{ \AA}$ . Backbones of dsDNAs are in color of white.

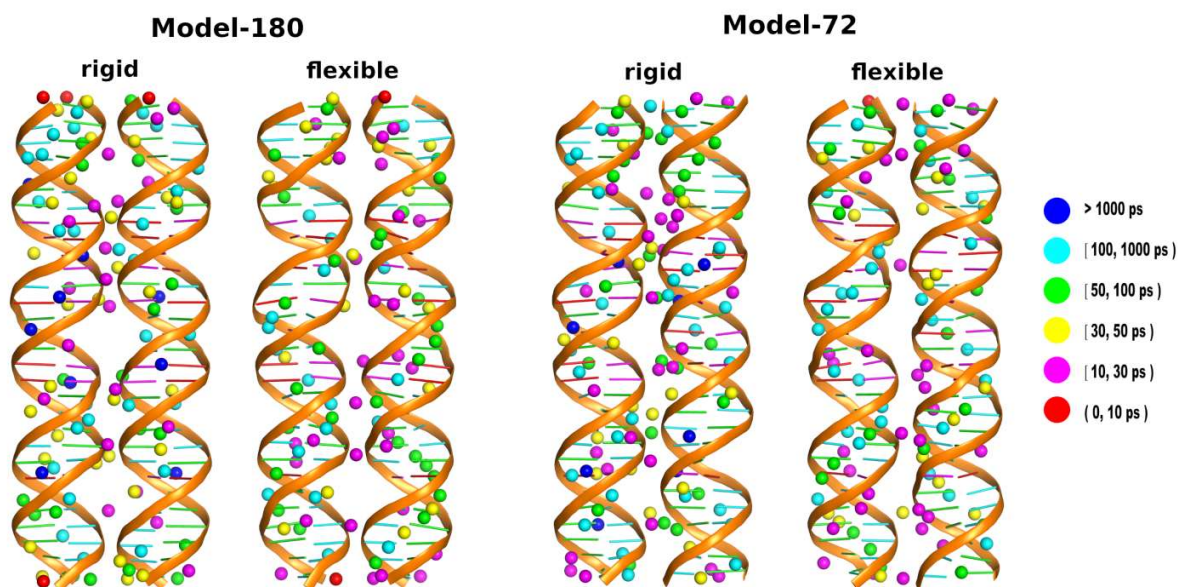

**Figure S4.** The effective sodium sites in the grooves and interface zone in the rigid and flexible Model180 and Model-72 with the inter-helical distance  $d = 22.4$  Å, respectively. The sites are colored with respect to residence time. The sites were finally identified until the separation of the sites is larger than 2.8 Å. The DNA bases are colored: A, red; T, magenta; G, green; and C, cyan. To identify effective sodium sites in a particular region, we first divided the trajectory into several blocks and generated sodium density map using a grid size of 0.5 Å for each block; then for the grid points whose densities are larger than a threshold ( $> 0.01$  # / point), we extracted the points which are  $\sim 70\%$  overlapped; we smoothed the points by density-weighted averaging the 6-closest neighbors.<sup>1</sup> A residence time at a site was approximated as the inverse slope of the linear region in  $\log(C(t))$  by linear least-squares fitting, in which  $C(t)$  is a survival time correlation function representing the average number of  $\text{Na}^+$  ions that remain in a site for a duration of time.<sup>2</sup>

**Table S1.** Probabilities that a location randomly chosen from the flexible system has higher diffusion coefficient than a location randomly chosen from the rigid one.

|                   | minor groove | major groove | interface |
|-------------------|--------------|--------------|-----------|
| Model-180, 22.4 Å | 0.66         | 0.59         | 0.61      |
| Model-180, 24.4 Å | 0.69         | 0.59         | 0.59      |
| Model-72, 22.4 Å  | 0.67         | 0.60         | 0.65      |
| Model-72, 23.7 Å  | 0.69         | 0.58         | 0.61      |
| Model-72, 24.9 Å  | 0.69         | 0.57         | 0.61      |

## References

1. Lai, C. L.; Chen, C.; Ou, S. C.; Prentiss, M.; Pettitt, B. M., Interactions between identical DNA double helices. *Phys Rev E* **2020**, *101* (3-1), 032414.
2. Feig, M.; Pettitt, B. M., Sodium and chlorine ions as part of the DNA solvation shell. *Biophys J* **1999**, *77* (4), 1769-81.
